# Supplementary material for: Oligonucleotide Sequence Motifs as Nucleosome Positioning Signals
Source: PLoS One. 2010 Jun 3;5(6):e10933. doi: 10.1371/journal.pone.0010933 (PMC2880596; doi:10.1371/journal.pone.0010933)
Supplement: Table S2 — Dinucleotide characterization in the Kaplan et al. 2009 in vitro library. In order to compare the tetranucleotides with their center dinucleotides, a table was constructed for the 16 dinucleotides containing the maximum amplitude periodicities, the FVOMAX and FVO10.2 values, the %FTS10.2 values, and the phase angles. The normalized FVO10.2 values for each dinucleotide are also included. (0.19 MB XLS) [file pone.0010933.s008.xls]

## Sheet: Sheet1
Di	Period (bp)	FVO Max	FVO 10.2	Normalized FVO	%FTS (10.2)	Phase θ
aa	10.2041	0.0702573	0.0702854	1.58398	0.300141	-173.306
ac	10.2564	0.0451905	0.0451896	1.01841	0.368347	-27.6477
ag	10.1523	0.0357521	0.0356181	0.802704	0.274603	-75.7456
at	11.236	0.0298048	0.0267251	0.602288	0.195851	-177.48
ca	10.2564	0.0333707	0.0333155	0.750812	0.224852	53.7613
cc	10.101	0.0577889	0.0550378	1.24036	0.255845	42.6024
cg	10.1523	0.0523007	0.0521067	1.1743	0.338334	2.52
ct	10.1523	0.0357521	0.0356181	0.802704	0.274603	80.7856
ga	9.70874	0.0252439	0.0130452	0.293992	0.165433	-41.168
gc	10.1523	0.0810233	0.0800766	1.80464	0.282659	2.52
gg	10.101	0.0577889	0.0550378	1.24036	0.255845	-37.5624
gt	10.2564	0.0451905	0.0451896	1.01841	0.368347	32.6877
ta	10.101	0.0470207	0.0460701	1.03826	0.377161	-177.48
tc	9.70874	0.0252439	0.0130452	0.293992	0.165433	46.208
tg	10.2564	0.0333707	0.0333155	0.750812	0.224852	-48.7213
tt	10.2041	0.0702573	0.0702854	1.58398	0.300141	178.346
